# Supplementary material for: Time course of efficacy of ubrogepant for the acute treatment of migraine: Clinical implications
Source: PubMed Central journal article supplement — Cephalalgia. 2020 Nov 26;41(5):546–60. doi: 10.1177/0333102420970523 (PMC8047719; doi:10.1177/0333102420970523), 2020-11-26
Supplement: sj-pdf-3-cep-10.1177_0333102420970523.pdf [file sj-pdf-3-cep-10.1177_0333102420970523.pdf]

**Supplementary Figure 3. Pain Freedom by Timepoint (mITT Population): ACHIEVE I and ACHIEVE II**

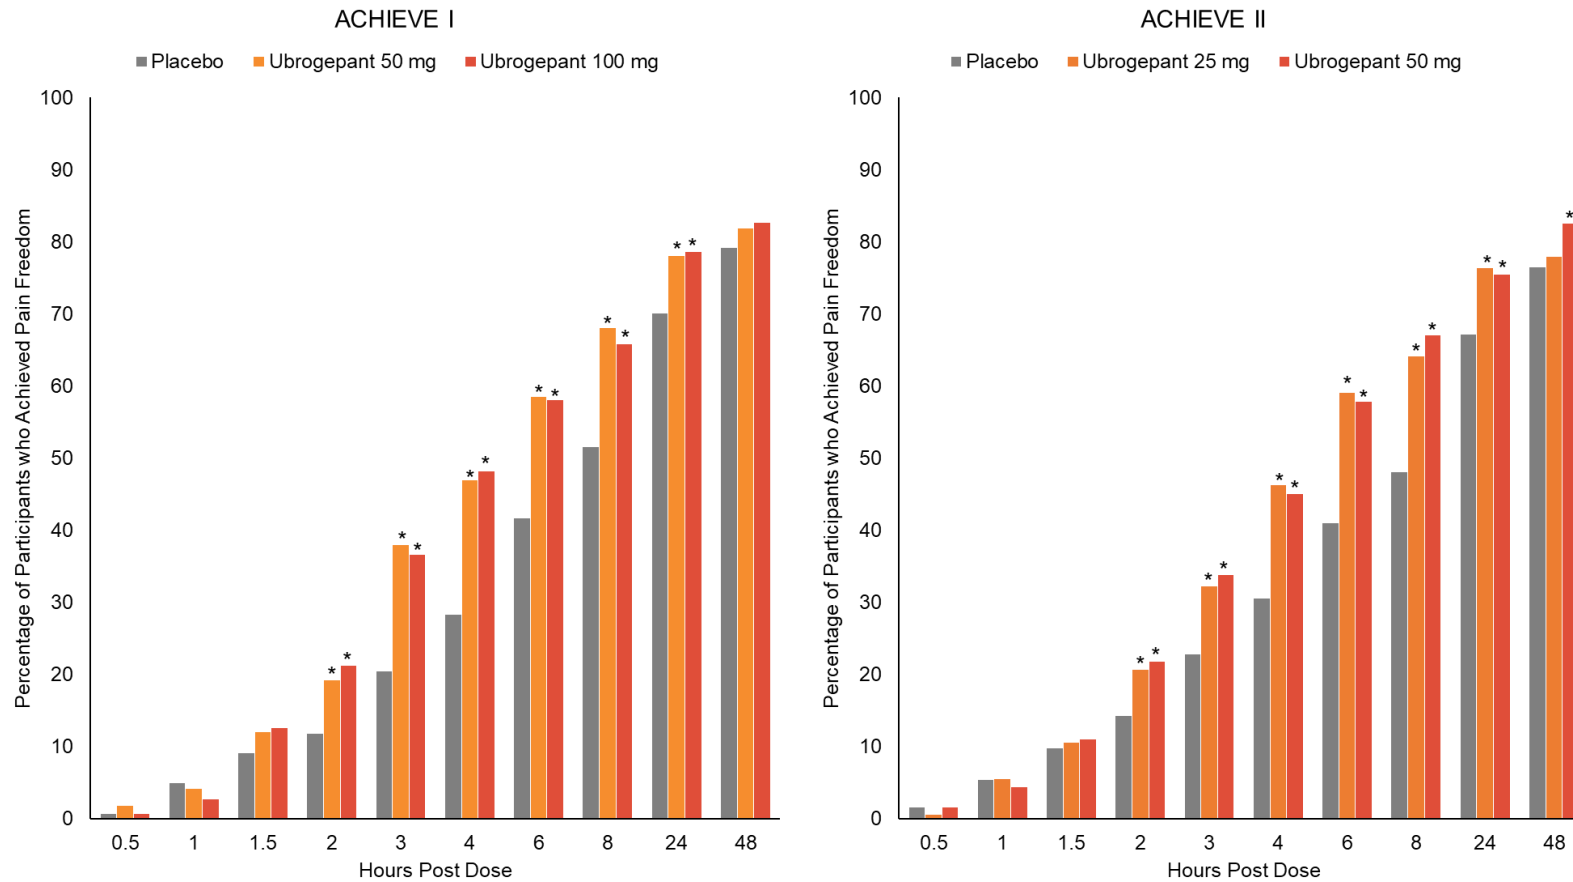

N1 = Number of patients with non-missing postdose pain severity assessment at or prior to the timepoint in the modified intent-to-treat population.

\*indicates p<0.05 versus placebo.

Missing data was handled using last observation carried forward.

Includes data from all participants, including those who took rescue medication or an optional second dose of trial treatment.

Odds ratio (95% CI) and p-value are based on logistic regression with treatment group, historical triptan response, use of medication for migraine prevention, and baseline headache severity as explanatory variables; these data are provided in Supplementary Table 4.

Inferences are based on adjusted p-values that account for multiple comparisons.

Percentages calculated as 100 x (n/N1).
