# Supplementary material for: Time course of efficacy of ubrogepant for the acute treatment of migraine: Clinical implications
Source: PubMed Central journal article supplement — Cephalalgia. 2020 Nov 26;41(5):546–60. doi: 10.1177/0333102420970523 (PMC8047719; doi:10.1177/0333102420970523), 2020-11-26
Supplement: sj-pdf-5-cep-10.1177_0333102420970523.pdf [file sj-pdf-5-cep-10.1177_0333102420970523.pdf]

**Supplementary Table 1.** Treatment-by-study Interaction Test of Heterogeneity

| <b>Hours Post Dose</b> | <b>Pain Relief</b> | <b>Absence of MBS</b> | <b>Pain Freedom</b> |
|------------------------|--------------------|-----------------------|---------------------|
| 0.5                    | <i>p</i> =0.47     | <i>p</i> =0.62        | <i>p</i> =0.22      |
| 1                      | <i>p</i> =0.94     | <i>p</i> =0.71        | <i>p</i> =0.80      |
| 1.5                    | <i>p</i> =0.98     | <i>p</i> =0.77        | <i>p</i> =0.46      |
| 2                      | <i>p</i> =0.78     | <i>p</i> =0.89        | <i>p</i> =0.66      |
| 3                      | <i>p</i> =0.85     | <i>p</i> =0.55        | <i>p</i> =0.09      |
| 4                      | <i>p</i> =0.72     | <i>p</i> =0.59        | <i>p</i> =0.26      |
| 6                      | <i>p</i> =0.67     | <i>p</i> =0.89        | <i>p</i> =0.80      |
| 8                      | <i>p</i> =0.41     | <i>p</i> =0.75        | <i>p</i> =0.78      |
| 24                     | <i>p</i> =0.42     | <i>p</i> =0.80        | <i>p</i> =0.86      |
| 48                     | <i>p</i> =0.34     | <i>p</i> =0.89        | <i>p</i> =0.43      |

Missing data were imputed using the last observation carried forward method.
