# Supplementary material for: Time course of efficacy of ubrogepant for the acute treatment of migraine: Clinical implications
Source: PubMed Central journal article supplement — Cephalalgia. 2020 Nov 26;41(5):546–60. doi: 10.1177/0333102420970523 (PMC8047719; doi:10.1177/0333102420970523), 2020-11-26
Supplement: sj-pdf-9-cep-10.1177_0333102420970523.pdf [file sj-pdf-9-cep-10.1177_0333102420970523.pdf]

**Supplementary Table 5.** Sustained Pain Relief and Sustained Pain Freedom (mITT population): ACHIEVE I and ACHIEVE II

|                                               | ACHIEVE I          |                             |                              | ACHIEVE II         |                             |                             |
|-----------------------------------------------|--------------------|-----------------------------|------------------------------|--------------------|-----------------------------|-----------------------------|
| Statistics                                    | Placebo<br>(N=456) | Ubrogepant 50 mg<br>(N=423) | Ubrogepant 100 mg<br>(N=448) | Placebo<br>(N=456) | Ubrogepant 25 mg<br>(N=435) | Ubrogepant 50 mg<br>(N=464) |
| Sustained Pain Relief 2-24 hours<br>n/N1 (%)  | 93/447<br>(20.8)   | 150/413<br>(36.3)           | 165/434<br>(38.0)            | 93/443<br>(21.0)   | 138/424<br>(32.5)           | 165/449<br>(36.7)           |
| vs. Placebo                                   |                    |                             |                              |                    |                             |                             |
| Odds Ratio (95% CI)                           |                    | 2.25<br>(1.65, 3.07)        | 2.39<br>(1.77, 3.24)         |                    | 1.82<br>(1.33, 2.48)        | 2.16<br>(1.59, 2.92)        |
| P-value                                       |                    | <.0001                      | <.0001                       |                    | 0.0002                      | <.0001                      |
| Adjusted p-value                              |                    | 0.0023                      | 0.0023                       |                    | 0.0711                      | 0.0129                      |
| Sustained Pain Freedom 2-24 hours<br>n/N1 (%) | 39/452<br>(8.6)    | 53/418<br>(12.7)            | 6/418<br>(15.4)              | 37/451<br>(8.2)    | 55/432<br>(12.7)            | 66/457<br>(14.4)            |
| vs. Placebo                                   |                    |                             |                              |                    |                             |                             |
| Odds Ratio (95% CI)                           |                    | 1.57<br>(1.01, 2.44)        | 1.95<br>(1.28, 2.97)         |                    | 1.62<br>(1.04, 2.53)        | 1.85<br>(1.20, 2.83)        |
| P-value                                       |                    | 0.0436                      | 0.0018                       |                    | 0.0317                      | 0.0051                      |
| Adjusted p-value                              |                    | 0.0577                      | 0.0037                       |                    | 0.0711                      | 0.0129                      |

N1 = Number of patients with determinable sustained pain relief from 2 to 24 hours after initial dose in the modified intent-to-treat population.

Pain Relief = Reduction of a moderate/severe migraine headache to a mild headache or to no headache.

Sustained Pain Relief = Pain relief at 2 hours with no administration of either rescue medication or optional second dose of trial treatment, and with no occurrence thereafter of a moderate or severe headache during the relevant number of hours after dosing with trial treatment.

Pain Freedom = Reduction in headache severity from moderate/severe at baseline to no pain.

Sustained Pain Freedom = Pain freedom at 2 hours with no administration of either rescue medication or optional second dose of trial treatment, and with no occurrence thereafter of a mild, moderate, or severe headache during the relevant number of hours after dosing with trial treatment.

Determinable cases = Participants for whom sustained pain relief from 2 to 24 hours status can be determined based on observed headache severity at scheduled time points, use of rescue medication or optional second dose between 2 and 24 hours, and the answer to the headache recurrence question at 24 or 48 hours.

Odds Ratio (95% CI) and p-value are based on logistic regression with treatment group, historical triptan response, use of medication for migraine prevention, and baseline headache severity as explanatory variables.

Inferences are based on adjusted p-values that account for multiple comparisons.

Percentages calculated as 100 x (n/N1).
