# Supplementary material for: Time course of efficacy of ubrogepant for the acute treatment of migraine: Clinical implications
Source: PubMed Central journal article supplement — Cephalalgia. 2020 Nov 26;41(5):546–60. doi: 10.1177/0333102420970523 (PMC8047719; doi:10.1177/0333102420970523), 2020-11-26
Supplement: sj-pdf-10-cep-10.1177_0333102420970523.pdf [file sj-pdf-10-cep-10.1177_0333102420970523.pdf]

**Supplementary Table 6.** Ubrogapant Pharmacokinetic Parameters: ACHIEVE I and ACHIEVE II

| PK Parameter                                 | ACHIEVE I |                    |     |                    | ACHIEVE II |                     |     |                    |
|----------------------------------------------|-----------|--------------------|-----|--------------------|------------|---------------------|-----|--------------------|
|                                              | N         | Ubrogapant 50 mg   | N   | Ubrogapant 100 mg  | N          | Ubrogapant 25 mg    | N   | Ubrogapant 50 mg   |
| <b>C<sub>max</sub></b><br><b>(ng/mL)</b>     | 272       | 143.489 ± 147.800  | 281 | 263.311 ± 167.691  | 332        | 75.319 ± 121.606    | 331 | 125.531 ± 82.539   |
| <b>AUC<sub>0-t</sub></b><br><b>(ng·h/mL)</b> | 272       | 333.051 ± 185.409  | 281 | 662.593 ± 449.262  | 325        | 169.342 ± 141.133   | 322 | 318.284 ± 205.855  |
| <b>T<sub>max</sub> (h)<sup>a</sup></b>       | 272       | 1.01 (0.00 - 9.00) | 281 | 1.95 (0.00 - 7.67) | 332        | 1.00 (0.00 - 12.00) | 331 | 1.02 (0.00 – 26.5) |

Data presented as mean ± standard deviation for C<sub>max</sub> and AUC.

T<sub>max</sub> presented as median (range)
