# Supplementary figures and images for: Time course of efficacy of ubrogepant for the acute treatment of migraine: Clinical implications
Source: PubMed Central journal article supplement — Cephalalgia. 2020 Nov 26;41(5):546–60. doi: 10.1177/0333102420970523 (PMC8047719; doi:10.1177/0333102420970523), 2020-11-26

**Supplementary Figure 4. Ubrogepant Concentration-Time Curves: ACHIEVE I and ACHIEVE II**

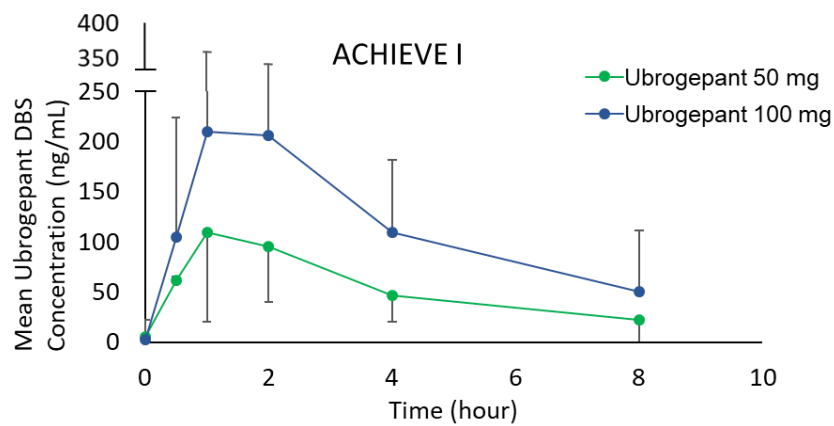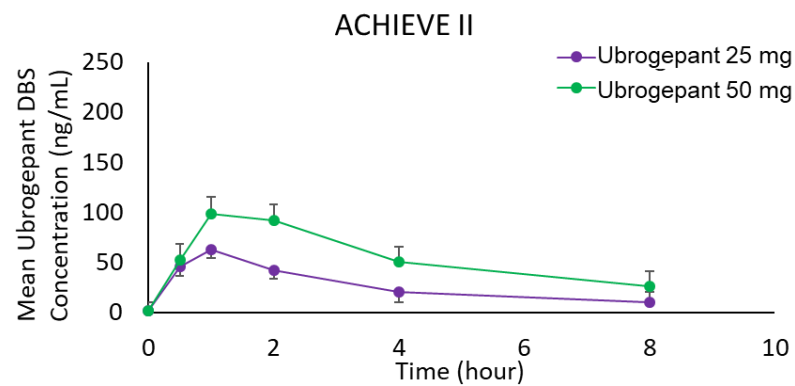

Supplement: sj-pdf-4-cep-10.1177_0333102420970523.pdf [file sj-pdf-4-cep-10.1177_0333102420970523.pdf]
